# Supplementary material for: Ultrasound-assisted sorption of Pb(ii) on multi-walled carbon nanotube in presence of natural organic matter: an insight into main and interaction effects using modelling approaches of RSM and BRT
Source: Royal Society of Chemistry journal article supplement (doi:10.1039/c9ra02881a), 2019-01-01
Supplement: c9ra02881a1.pdf [file c9ra02881a1.pdf]

## Supplementary Data

# Ultrasound-assisted sorption of Pb(ii) on multi-walled carbon nanotube in presence of natural organic matter: an insight into main and interaction effects using modelling approaches of RSM and BRT

### 1- Maryam Foroughi

a- Department of Environmental Health, School of Health, Torbat Heydariyeh University of Medical Sciences, Torbat Heydariyeh, Iran

b- Health Sciences Research Center, Torbat Heydariyeh University of Medical Sciences, Torbat Heydariyeh, Iran.

### 2- Hassan Zolghadr Nasab

Department of Environmental Health Engineering & Research Centre for Health Sciences, School of Public Health, Hamadan University of Medical Sciences, Hamadan, Iran.

### 3- Reza Shokoohi\*

Department of Environmental Health Engineering & Research Centre for Health Sciences, School of Public Health, Hamadan University of Medical Sciences, Hamadan, Iran.

\*Corrospounding author.

Email: [reza.shokohi@umsha.ac.ir](mailto:reza.shokohi@umsha.ac.ir), [shokoohia@yahoo.com](mailto:shokoohia@yahoo.com).

Tel.: +98 38380026; Fax: +98 8138380509

### 4- Mohammad Hossein Ahmadi Azqhandi

Applied Chemistry Department, Faculty of Gas and Petroleum (Gachsaran), Yasouj University, Gachsaran 75813-56001, Iran.

### 5- Azam Nadali

Department of Environmental Health Engineering & Research Centre for Health Sciences, School of Public Health, Hamadan University of Medical Sciences, Hamadan, Iran.

### 6- Ashraf Mazaheri

Department of Environmental Health Engineering & Research Centre for Health Sciences, School of Public Health, Hamadan University of Medical Sciences, Hamadan, Iran.

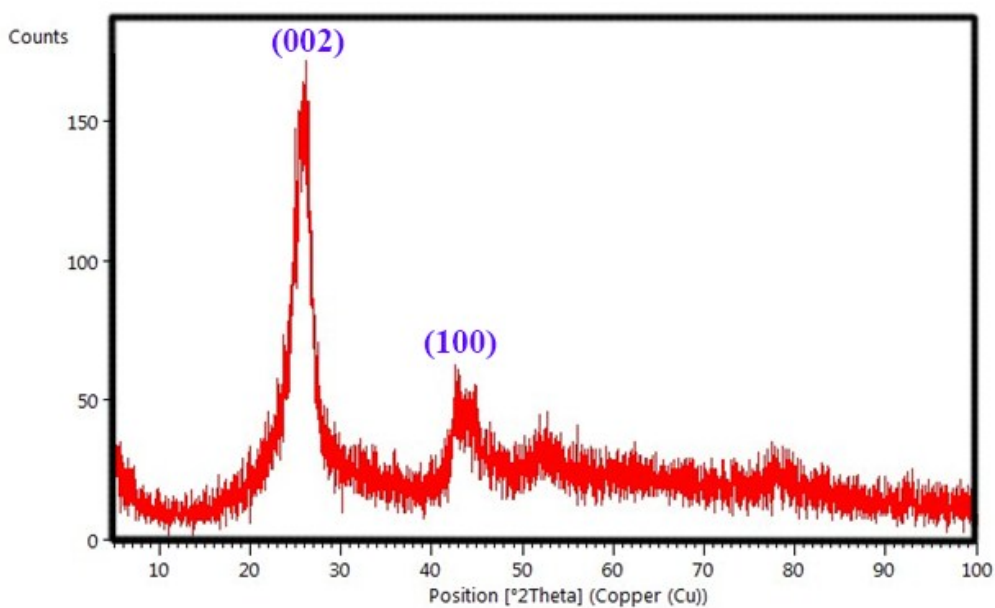

**Fig. S1.** XRD pattern for MWCNTs.

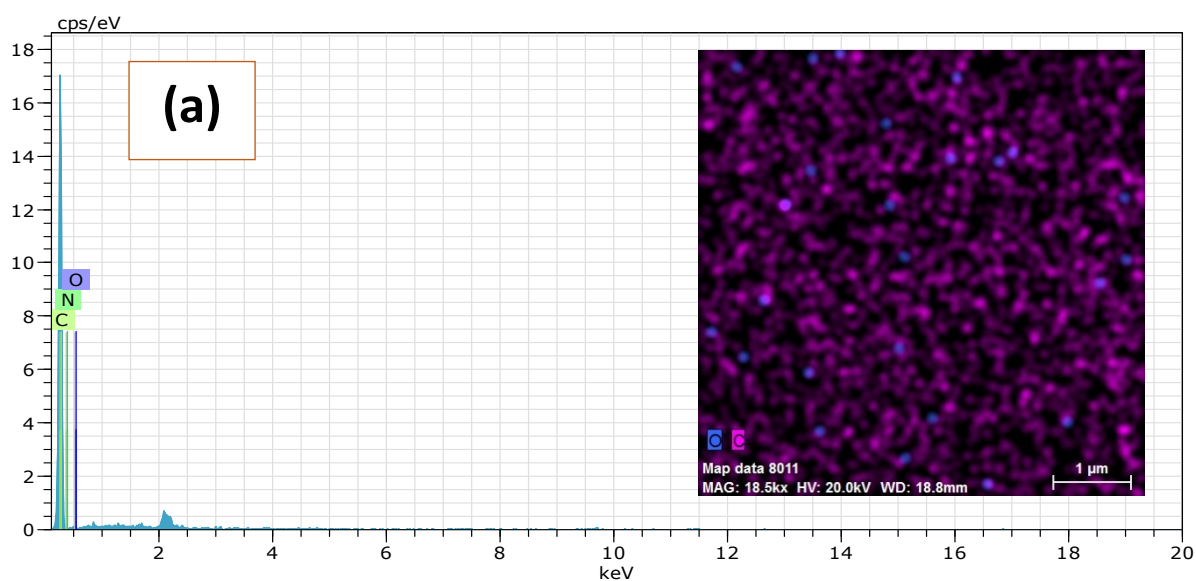

|       | El           | AN Series un. | C norm. | C Atom. | C Error (1 Sigma) |
|-------|--------------|---------------|---------|---------|-------------------|
|       |              | [wt.%]        | [wt.%]  | [at.%]  | [wt.%]            |
| ----- |              |               |         |         |                   |
|       | C 6 K-series | 92.23         | 92.23   | 93.57   | 14.71             |
|       | N 7 K-series | 4.65          | 4.65    | 4.05    | 4.78              |
|       | O 8 K-series | 3.12          | 3.12    | 2.38    | 2.46              |
| ----- |              |               |         |         |                   |
|       | Total:       | 100.00        | 100.00  | 100.00  |                   |

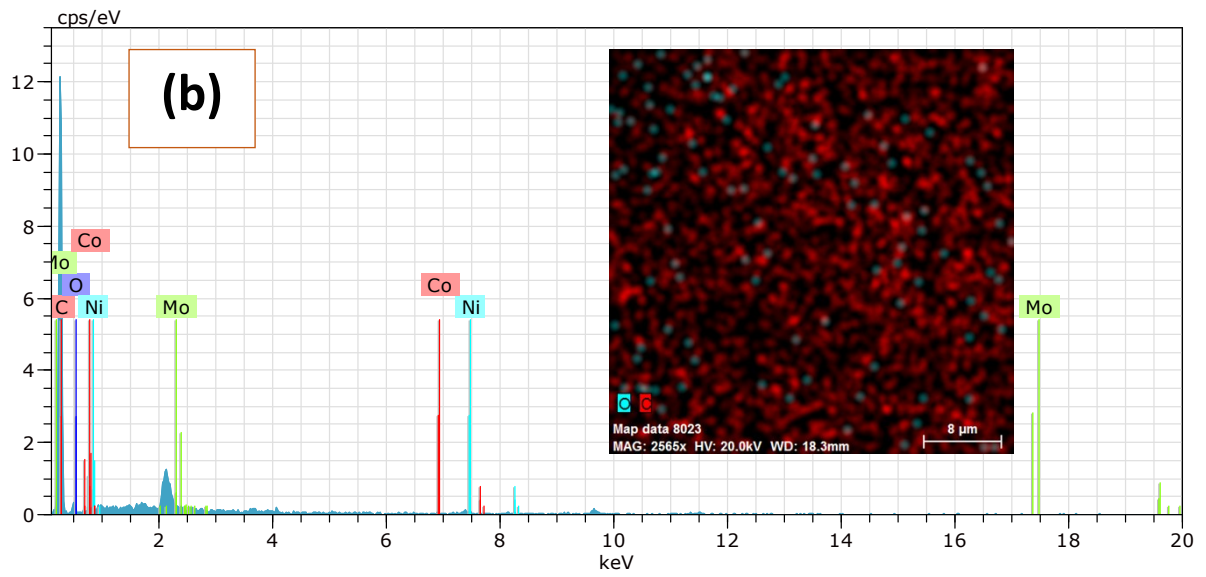

| El     | AN | Series   | unn. C [wt.%] | norm. C [wt.%] | Atom. C [at.%] | Error (1 Sigma) [wt.%] |
|--------|----|----------|---------------|----------------|----------------|------------------------|
| C      | 6  | K-series | 89.94         | 89.94          | 93.64          | 15.88                  |
| O      | 8  | K-series | 7.59          | 7.59           | 5.93           | 4.56                   |
| Mo     | 42 | L-series | 1.23          | 1.23           | 0.16           | 0.16                   |
| Ni     | 28 | K-series | 0.94          | 0.94           | 0.20           | 0.19                   |
| Co     | 27 | K-series | 0.30          | 0.30           | 0.06           | 0.12                   |
| Total: |    |          | 100.00        | 100.00         | 100.00         |                        |

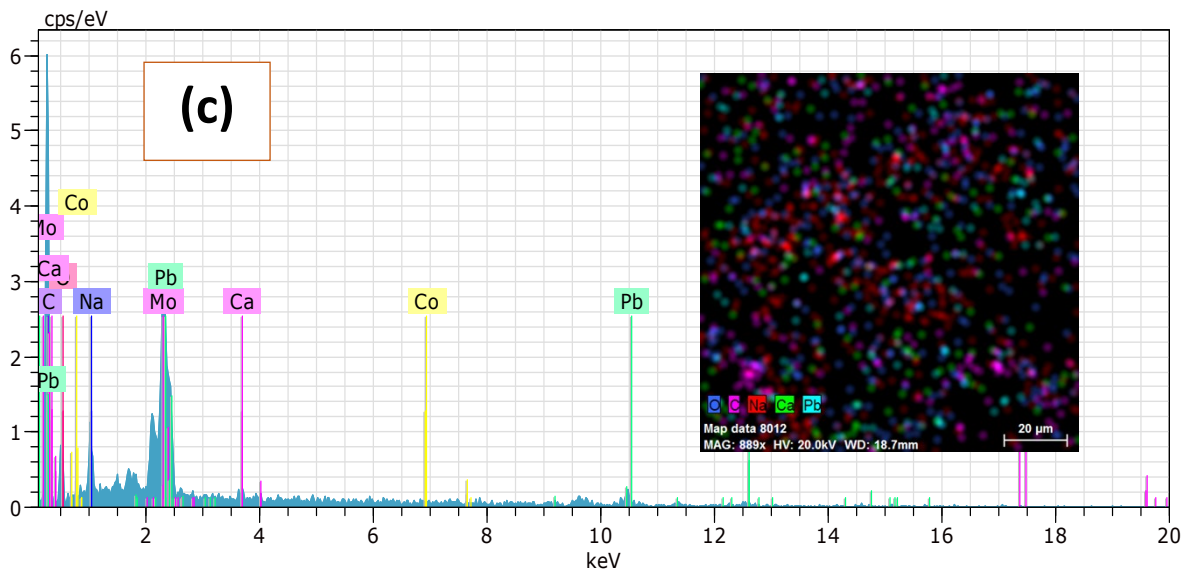

| El | AN | Series   | unn. C [wt.%] | norm. C [wt.%] | Atom. C [at.%] | Error (1 Sigma) [wt.%] |
|----|----|----------|---------------|----------------|----------------|------------------------|
| C  | 6  | K-series | 40.94         | 55.88          | 79.59          | 8.14                   |
| Pb | 82 | L-series | 11.61         | 15.85          | 1.31           | 1.19                   |

|        |    |          |       |        |        |      |
|--------|----|----------|-------|--------|--------|------|
| O      | 8  | K-series | 10.07 | 13.74  | 14.70  | 3.58 |
| Mo     | 42 | L-series | 7.78  | 10.62  | 1.89   | 0.42 |
| Na     | 11 | K-series | 2.05  | 2.80   | 2.08   | 0.25 |
| Ca     | 20 | K-series | 0.55  | 0.75   | 0.32   | 0.10 |
| Co     | 27 | K-series | 0.26  | 0.36   | 0.10   | 0.10 |
| -----  |    |          |       |        |        |      |
| Total: |    |          | 73.27 | 100.00 | 100.00 |      |

**Fig. S2.** EDX elemental analysis of MWCNTs, MWCNTs-HA, and MWCNTs-HA-Pb along with their corresponding chemical composition and elemental mapping.

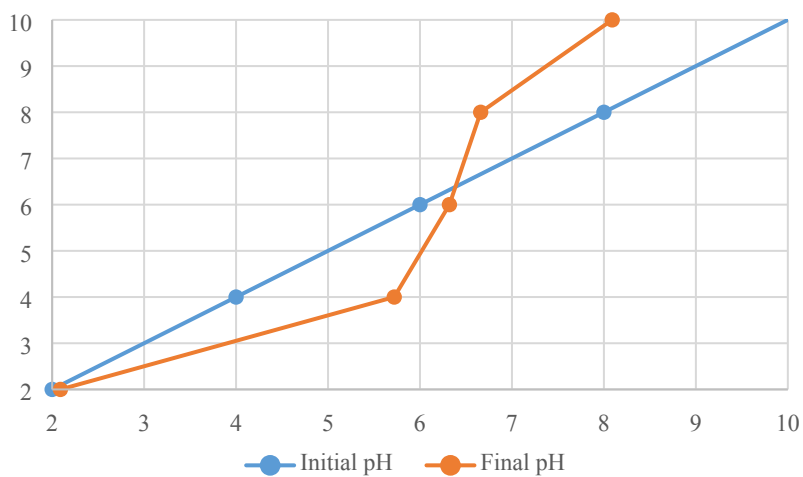

**Fig. S3.** Point of zero charge ( $\text{pH}_{\text{pzc}}$ ) of MWCNTs

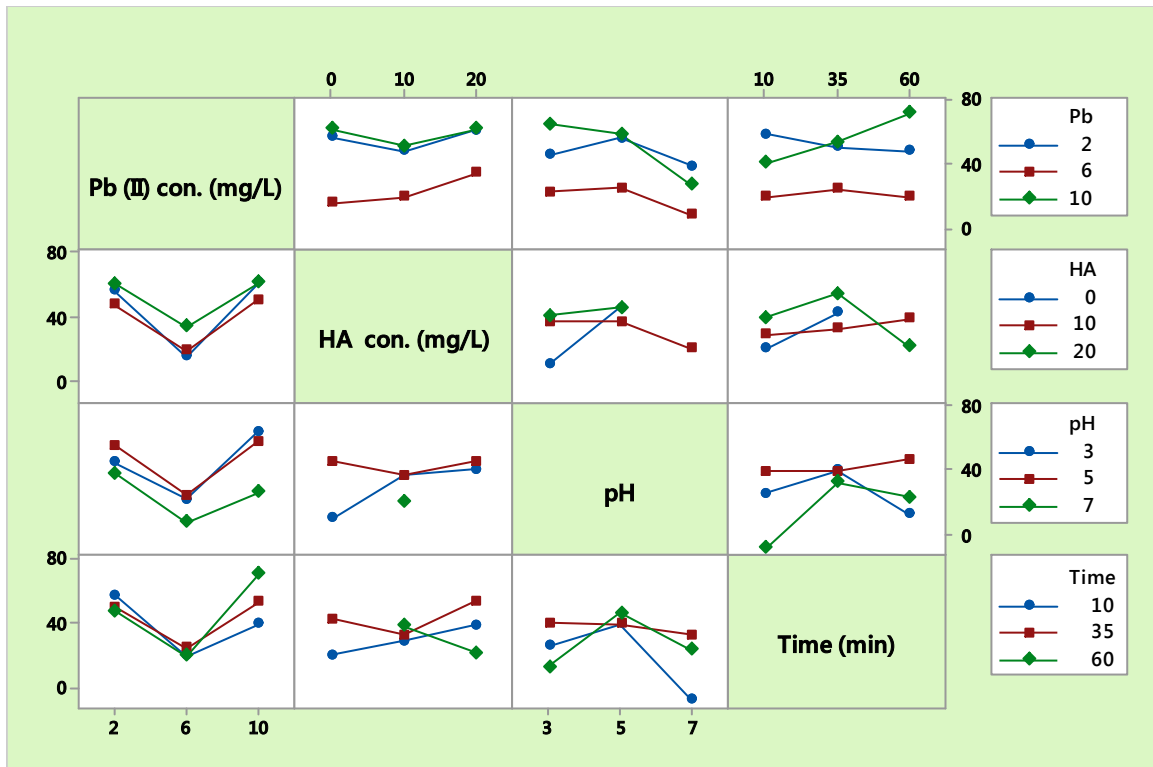

**Fig. S4.** Interaction plot for the removal efficiency
